# Supplementary material for: Current status and influencing factors of self-management in patients with non-valvular atrial fibrillation under different anticoagulant therapy in Jiangsu province, China: A multi-center across‑sectional study
Source: Research Square preprint supplement (doi:10.21203/rs.3.rs-113956/v1), 2020-12-01
Supplement: Supplementary file 1 [file 2624eab1c4cd3055e1ef73b1.docx]

**Current status and influencing factors of self-management in patients with non-valvular atrial fibrillation** **under different anticoagulant** **therapy in Jiangsu province, China: A multi-center across‑sectional study**

Ting Liu1, Mengxiao Ren2, Lingling Cui2, Bingqing Lu3, Jie Hui3, Omorogieva Ojo4, Xiaohua Wang3

1ICU of the emergency department, the First Affiliated Hospital of Soochow University, Suzhou 215006, China

2 School of Nursing, Soochow University, Suzhou 215006, China

3 Division of Cardiology, the First Affiliated Hospital of Soochow University, Suzhou 215006, China.

4Department of Adult Nursing and Paramedic Science, University of Greenwich, London SE9 2UG, UK

**Ting Liu and Mengxiao Ren made the same contribution to this study.**

Ting Liu, E-mail address: [lt322426@163.com](mailto:lt322426@163.com)

Mengxiao Ren, E-mail address: [20185231008@stu.suda.edu.cn](mailto:20185231008@stu.suda.edu.cn)

Lingling Cui, E-mail address: [20185231001@stu.suda.edu.cn](mailto:20185231001@stu.suda.edu.cn)

Bingqing Lu, E-mail address: [465829610@qq.com](mailto:465829610@qq.com)

Jie Hui, E-mail address: huijie92@163.com

Omorogieva Ojo, E-mail address: o.ojo@greenwich.ac.uk

**Corresponding author**

Xiaohua Wang, Division of Cardiology, the First Affiliated Hospital of Soochow University, Shizi Street, Suzhou 215006, China. Telephone number: +8613814880208, Fax: +86-0512-65125097, Email: [sxwang2001@163.com](mailto:sxwang2001@163.com)

**The self-management scales for AF patients**

**Scale 1 Self-management scale for AF patients with** **No medication**

**On the option that best fits your situation of last month“√”**

| “**always**”means **everyda**y；“**often**”means **2-3 times/week**；  “**sometimes**”means **2-3 times/2weeks** | **Always** | **Often** | **Sometimes** | **Never** |
| --- | --- | --- | --- | --- |
| **1.** I smoke |  |  |  |  |
| **2.** I drink |  |  |  |  |
| **3.** I drink strong tea, coffee, cola.ect |  |  |  |  |
| **4.** I live regular, ensure adequate sleep and rest, avoid day and night upside down |  |  |  |  |
| **5．**I exercise moderately and avoid strenuous exercise |  |  |  |  |
| 1. I **focus on** the symptoms of cerebral infarction, such as reduced fluency in speech, facial hemiparalysis and unsteady walking |  |  |  |  |
| **7.1** I **focus on** the symptoms of AF such as palpitations, chest distress and [polypnea](https://www.englisher.net/dict/en/polypnea/" \o "polypnea的中文翻译) |  |  |  |  |
| **7.2** I **focus on** myocardial infarction symptoms such as severe chest pain, chest tightness, [polypnea](https://www.englisher.net/dict/en/polypnea/" \o "polypnea的中文翻译) and cold sweating |  |  |  |  |
| **8.** I **focus on** the symptoms of renal infarction such as lumbago, celialgia and altered urinary elimination |  |  |  |  |
| **9.** I **focus on** the symptoms of limb infarction, such as unilateral limb skin color and temperature change, limb swelling |  |  |  |  |
| **10.** I monitor my pulse |  |  |  |  |
| **11.** I regular had outpatient checkups as ordered |  |  |  |  |

**Scale 2 Self-management scale for AF patients take NOAC and Aspirin**

**On the option that best fits your situation of last month“√”**

| “**always**”means **everyda**y；“**often**”means **2-3 times/week**；  “**sometimes**”means **2-3 times/2weeks** | **Always** | **Often** | **Sometimes** | **Never** |
| --- | --- | --- | --- | --- |
| **1.** I smoke |  |  |  |  |
| **2.** I drink |  |  |  |  |
| **3.** I drink strong tea, coffee, cola.ect |  |  |  |  |
| **4.** I live regular, ensure adequate sleep and rest, avoid day and night upside down |  |  |  |  |
| **5．**I exercise moderately and avoid strenuous exercise |  |  |  |  |
| 1. I **focus on** the symptoms of cerebral infarction, such as reduced fluency in speech, facial hemiparalysis and unsteady walking |  |  |  |  |
| **7.1** I **focus on** the symptoms of AF such as palpitations, chest distress and [polypnea](https://www.englisher.net/dict/en/polypnea/" \o "polypnea的中文翻译) |  |  |  |  |
| **7.2** I **focus on** myocardial infarction symptoms such as severe chest pain, chest tightness, [polypnea](https://www.englisher.net/dict/en/polypnea/" \o "polypnea的中文翻译) and cold sweating |  |  |  |  |
| **8.** I **focus on** the symptoms of renal infarction such as lumbago, celialgia and altered urinary elimination |  |  |  |  |
| **9.** I **focus on** the symptoms of limb infarction, such as unilateral limb skin color and temperature change, limb swelling |  |  |  |  |
| **10.** I monitor my pulse |  |  |  |  |
| **11.** I regular had outpatient checkups as ordered |  |  |  |  |
| 1. I see a doctor as soon as possible when I had unexplained bleeding( spontaneous bleeding of nose and gingiva, skin ecchymosis, hematuria and melena) |  |  |  |  |
| 1. I extend the pressing time appropriately when I encountered a simple intrusive operation, such as injection or blood drawing, skin injury or bleeding |  |  |  |  |

**Scale 3 Self-management scale for AF patients take Warfarin**

**On the option that best fits your situation of last month“√”**

| “**always**”means **everyda**y；“**often**”means **2-3 times/week**；  “**sometimes**”means **2-3 times/2weeks** | | **Always** | **Often** | **Sometimes** | **Never** |
| --- | --- | --- | --- | --- | --- |
| **1.** I smoke | |  |  |  |  |
| **2.** I drink | |  |  |  |  |
| **3.** I drink strong tea, coffee, cola.ect | |  |  |  |  |
| **4.** I live regular, ensure adequate sleep and rest, avoid day and night upside down | |  |  |  |  |
| **5．**I exercise moderately and avoid strenuous exercise | |  |  |  |  |
| 1. I **focus on** the symptoms of cerebral infarction, such as reduced fluency in speech, facial hemiparalysis and unsteady walking | |  |  |  |  |
| **7.1** I **focus on** the symptoms of AF such as palpitations, chest distress and [polypnea](https://www.englisher.net/dict/en/polypnea/" \o "polypnea的中文翻译) | |  |  |  |  |
| **7.2** I **focus on** myocardial infarction symptoms such as severe chest pain, chest tightness, [polypnea](https://www.englisher.net/dict/en/polypnea/" \o "polypnea的中文翻译) and cold sweating | |  |  |  |  |
| **8.** I **focus on** the symptoms of renal infarction such as lumbago, celialgia and altered urinary elimination | |  |  |  |  |
| **9.** I **focus on** the symptoms of limb infarction, such as unilateral limb skin color and temperature change, limb swelling | |  |  |  |  |
| **10.** I monitor my pulse | |  |  |  |  |
| **11.** I regular had outpatient checkups as ordered | |  |  |  |  |
| 1. I see a doctor as soon as possible when I had unexplained bleeding( spontaneous bleeding of nose and gingiva, skin ecchymosis, hematuria and melena) | |  |  |  |  |
| 1. I extend the pressing time appropriately when I encountered a simple intrusive operation, such as injection or blood drawing, skin injury or bleeding | |  |  |  |  |
| Patients who take warfarin, please fill in the following four items | **14.** I monitor INR during I take warfarin |  |  |  |  |
| **15.** I increase the times of INR monitoring when occurring some problems ( trauma, infection, fever, hyperthyroidism, diarrhea, etc ) |  |  |  |  |
| **16.** I increase the times of INR monitoring during medication adjustment |  |  |  |  |
| **17.** I make no excessive adjustments of my diet |  |  |  |  |

AF: atrial fibrillation; INR: international normalized ratio. Dimension of “adverse hobbies” including item 1, 2, 3; dimension of “daily routine and exercise” including item 4, 5; dimension of “monitoring the symptoms of embolism and AF” including item 6, 7, 8, 9, 10, 11; dimension of “monitoring the symptoms of bleeding” including item 12, 13; dimension of “warfarin-specific management” including item 14, 15, 16, 17.
